# Supplementary material for: Supraspecific units in correlative niche modeling improves the prediction of geographic potential of biological invasions
Source: PeerJ journal article supplement (doi:10.7717/peerj.10454), 2020-12-22

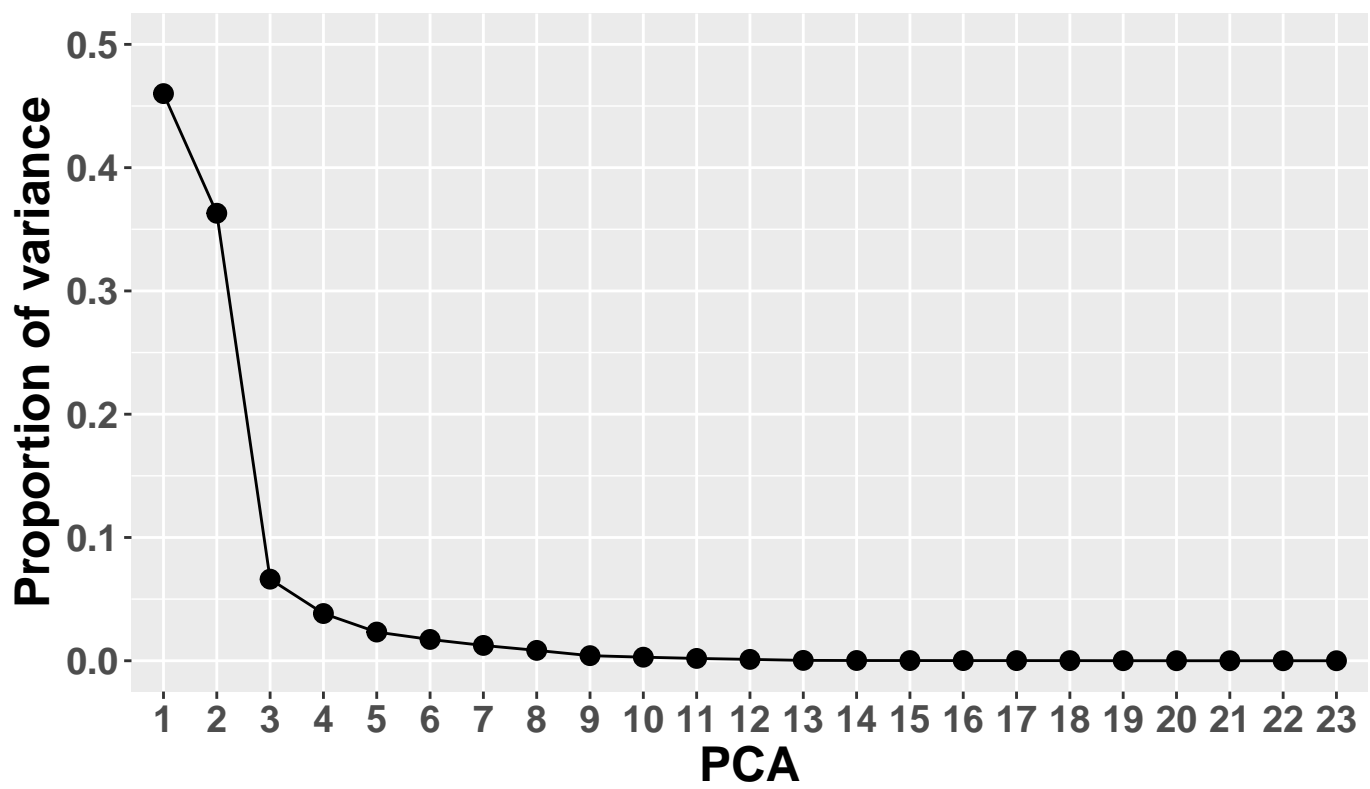

Supplement: Fig_S1_Scree_plot_pca_ter.pdf [file Fig_S1_Scree_plot_pca_ter.pdf]
