# Supplementary material for: Supraspecific units in correlative niche modeling improves the prediction of geographic potential of biological invasions
Source: PeerJ journal article supplement (doi:10.7717/peerj.10454), 2020-12-22

**Proportion of variance**

0.6  
0.4  
0.2  
0.0

1 2 3 4 5 6 7 8 9 10 11 12

**PCA**

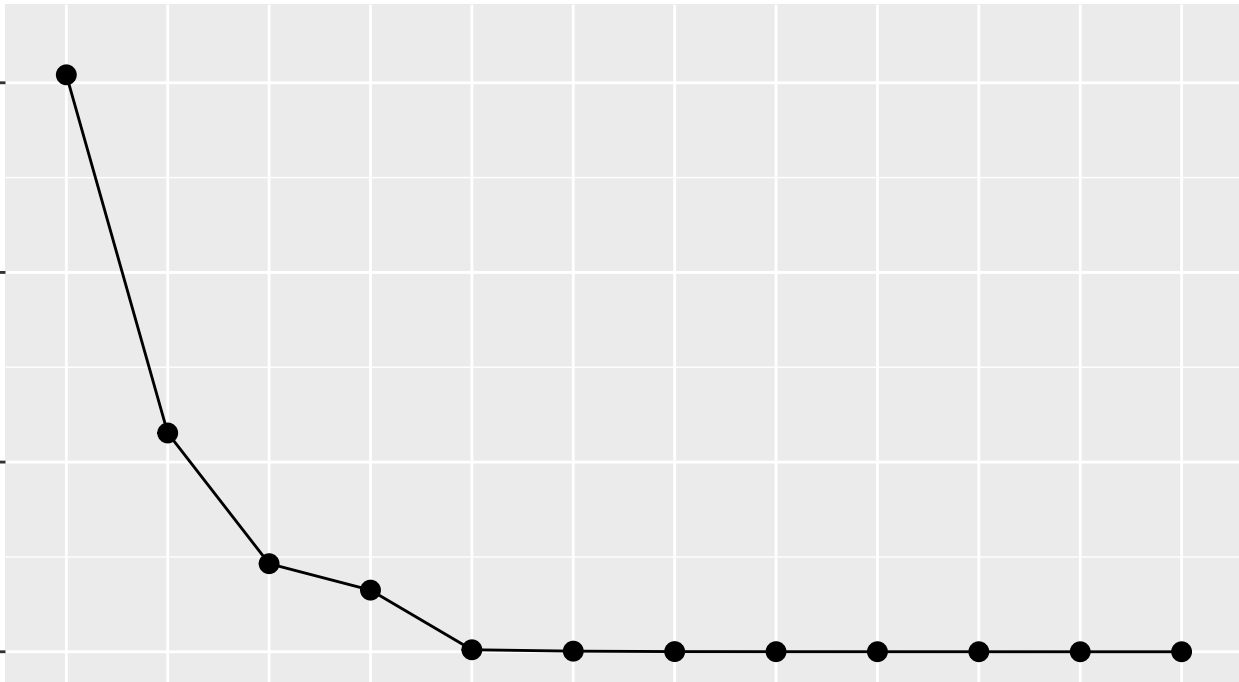

Supplement: Fig_S2_Scree_plot_pca_mar.pdf [file Fig_S2_Scree_plot_pca_mar.pdf]
