# Supplementary material for: Supraspecific units in correlative niche modeling improves the prediction of geographic potential of biological invasions
Source: PubMed Central journal article supplement (PMC7761189; doi:10.7717/peerj.10454), 2020-12-22

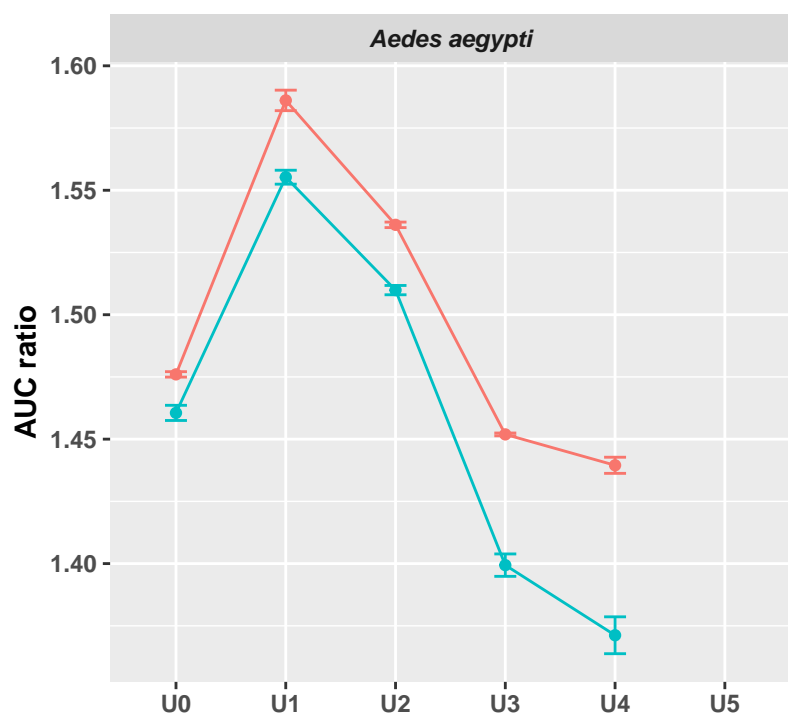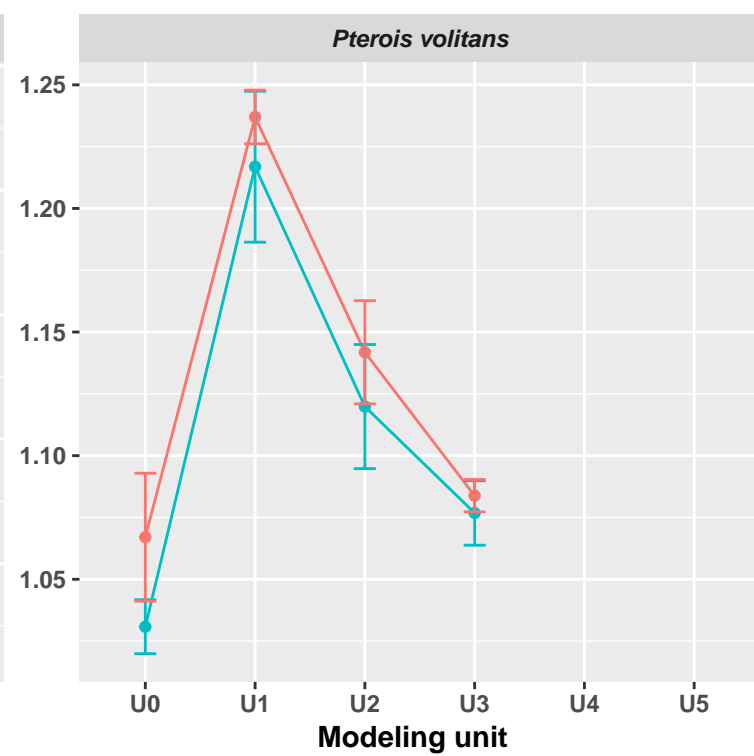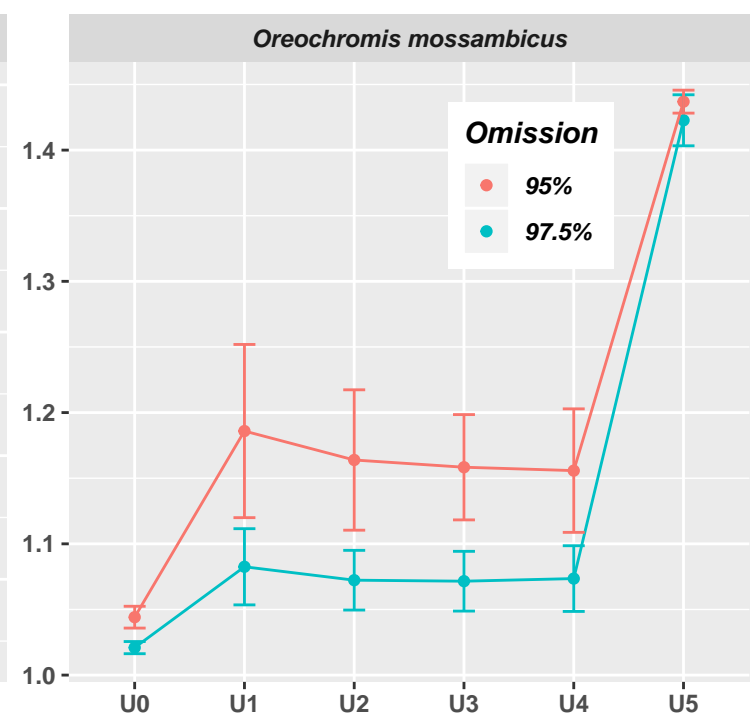

Supplement: peerj-08-10454-s004.pdf [file peerj-08-10454-s004.pdf]
