# Supplementary material for: Supraspecific units in correlative niche modeling improves the prediction of geographic potential of biological invasions
Source: PeerJ journal article supplement (doi:10.7717/peerj.10454), 2020-12-22
Supplement: Supplemental_Information.pdf [file Supplemental_Information.pdf]

## Supplemental information

**Table S1:** Input data for the ecological niche models. NSp = number of species included in the modeling unit. MVE = minimum-volume ellipsoid.

| Focal species                  | Unit name | NSp | Number of presence records used in MVE modeling |        | Number of presence records used in Maxent modeling |
|--------------------------------|-----------|-----|-------------------------------------------------|--------|----------------------------------------------------|
|                                |           |     | 95%                                             | 97.50% |                                                    |
| <i>Aedes aegypti</i>           | U0        | 1   | 484                                             | 490    | 196                                                |
|                                | U1        | 2   | 405                                             | 444    | 579                                                |
|                                | U2        | 5   | 701                                             | 706    | 746                                                |
|                                | U3        | 8   | 1855                                            | 1903   | 1470                                               |
|                                | U4        | 9   | 1987                                            | 2008   | 1587                                               |
|                                | UT        | 1   | 29940                                           | 30415  | 2866                                               |
| <i>Pterois volitans</i>        | U0        | 1   | 389                                             | 390    | 80                                                 |
|                                | U1        | 2   | 493                                             | 503    | 80                                                 |
|                                | U2        | 4   | 788                                             | 793    | 80                                                 |
|                                | U3        | 5   | 876                                             | 881    | 100                                                |
|                                | UT        | 1   | 643                                             | 651    | 101                                                |
| <i>Oreochromis mossambicus</i> | U0        | 1   | 362                                             | 362    | 98                                                 |
|                                | U1        | 2   | 596                                             | 599    | 185                                                |
|                                | U2        | 3   | 682                                             | 686    | 194                                                |
|                                | U3        | 5   | 612                                             | 619    | 198                                                |
|                                | U4        | 6   | 525                                             | 527    | 201                                                |
|                                | U5        | 8   | 750                                             | 754    | 262                                                |
|                                | UT        | 1   | 718                                             | 724    | 783                                                |

**Table S2:** Environmental surfaces used in the estimation of the MVEs of the terrestrial species.

| <b>Bioclimatic variables</b> | <b>Bioclimatic variables full names</b>                       |
|------------------------------|---------------------------------------------------------------|
| BIO1                         | Annual mean temperature (°C)                                  |
| BIO2                         | Mean diurnal temperature range (mean (period max - min)) (°C) |
| BIO3                         | Isothermality (BIO2/BIO7)                                     |
| BIO4                         | Temperature seasonality (C of V)                              |
| BIO5                         | Max temperature of warmest week (°C)                          |
| BIO6                         | Min temperature of coldest week (°C)                          |
| BIO7                         | Temperature annual range (BIO5-BIO6) (°C)                     |
| BIO10                        | Mean temperature of warmest quarter (°C)                      |
| BIO11                        | Mean temperature of coldest quarter (°C)                      |
| BIO12                        | Annual precipitation (mm)                                     |
| BIO13                        | Precipitation of wettest week (mm)                            |
| BIO14                        | Precipitation of driest week (mm)                             |
| BIO16                        | Precipitation of wettest quarter (mm)                         |
| BIO17                        | Precipitation of driest quarter (mm)                          |
| BIO20                        | Annual mean radiation (W m <sup>-2</sup> )                    |
| BIO21                        | Highest weekly radiation (W m <sup>-2</sup> )                 |
| BIO22                        | Lowest weekly radiation (W m <sup>-2</sup> )                  |
| BIO23                        | Radiation seasonality (C of V)                                |
| BIO28                        | Annual mean moisture index                                    |
| BIO29                        | Highest weekly moisture index                                 |
| BIO30                        | Lowest weekly moisture index                                  |
| BIO32                        | Mean moisture index of wettest quarter                        |
| BIO33                        | Mean moisture index of driest quarter                         |

**Table S3:** Environmental surfaces used in the estimation of the MVEs of the marine species. Lt: average of minimum and maximum records per year.

---

| <b>Bioclimatic variables</b>            |
|-----------------------------------------|
| Present Surface Temperature Min (°C)    |
| Present Surface Temperature Max (°C)    |
| Present Surface Temperature Mean (°C)   |
| Present Surface Temperature Lt Min (°C) |
| Present Surface Temperature Lt Max (°C) |
| Present Surface Temperature Range (°C)  |
| Present Surface Salinity Min (PSS)      |
| Present Surface Salinity Max (PSS)      |
| Present Surface Salinity Mean (PSS)     |
| Present Surface Salinity Lt Min (PSS)   |
| Present Surface Salinity Lt Max (PSS)   |
| Present Surface Salinity Range (PSS)    |

---

## Maxent methods

Maxent models were calibrated across the **M** area designed for each modeling unit. We partitioned presence records into two sets, training and evaluation, using the block function of ENMeval (Muscarella et al., 2014). Settings for the model construction were: the crossvalidation/replicated functionality, three features (l=linear, q=quadratic and p=product), regularization multipliers from 1 up to 4, and a “logistic” output. We chose the previous features trying to emulate mathematical functions fitted in MVEs, in order to minimize differences between algorithms given by factors other than the presence data. We also set aside 50% of presences as a test percentage and conducted five replicates analysis to take into account the variances due to specific calibration data sets on model outputs. Finally, the models were projected worldwide applying truncation as transfer procedure.

## Maxent results

In all three species, the AUC ratio of the partial ROC test increased when occurrences of closely related species were included (Fig. S3). This increase was similar to that observed in the MVEs, where it was clearer in *Ae. aegypti* and *P. volitans* whereas in *O. mossambicus* the greatest increase in performance was reached up to U5.

For *Ae. aegypti*, thresholded models of U0 failed to predict the invasion in different regions that are predicted by U1, such as in the Florida Peninsula, central Mexico, the Atlantic Forest and eastern Australia (Fig. S4B and Fig. S5A and C).

In *P. volitans*, unlike U0, the U1 model predicts invasion in the Red Sea, the Adriatic Seas and in the Persian Gulf (Fig. S4D and Fig. S5D and E).

The U0 model of *O. mossambicus* predicts regions with invasion records in Florida, Texas, central Mexico and eastern Australia that correspond to areas not predicted by U5. In contrast, the U5 model predicts the invasion locations in part of Central America, the Mexican Pacific, the Colombian Andes, Madagascar, and Southeast Asia that are not predicted in thresholded models of U0 (Fig. S4F and Fig. S5G and I).

## Supplemental figure legends

**Figure S1:** Scree plot showing the decreasing rate at which variance is explained by additional principal components of the terrestrial environment.

**Figure S2:** Scree plot showing the decreasing rate at which variance is explained by additional principal components of the marine environment.

**Figure S3:** Average AUC ratios of the ecological niche models obtained with Maxent for each modeling unit. Bars indicate the standard deviation.

**Figure S4:** Presence records of the native range (black X's), invasion range (green X's), and those included in the supraspecific unit with the highest AUC ratio (red X's) of *Aedes aegypti* (A), *Pterois volitans* (C) and *Oreochromis mossambicus* (E).

Potential distribution models obtained with Maxent using the black X's as input presence data (light blue) (i.e., U0), and potential distribution models obtained with Maxent using the black X's + red X's as input presence data (dark blue) (i.e., U1) for *Ae. aegypti* (B), *P. volitans* (D) and *O. mossambicus* (F).

**Figure S5:** Regional views of the potential distribution (obtained with Maxent) across the invasion area of *Aedes aegypti* (A, B and C). *Pterois volitans* (D, E and F) and *Oreochromis mossambicus* (G, H and I). Light blue model = distribution estimated from U0; Dark blue model = distribution estimated from the supraspecific unit with the highest AUC ratio; Green X's = presence records of the invaded areas.
